# Supplementary material for: Social dynamics modeling of chrono-nutrition
Source: PubMed Central journal article supplement (PMC6370249; doi:10.1371/journal.pcbi.1006714), 2019-01-30
Supplement: pcbi.1006714.s002.pdf [file pcbi.1006714.s002.pdf]

| <b>Feedback One</b>                                      |                    |
|----------------------------------------------------------|--------------------|
| <b>Top 10 Positively Correlated Fluxes</b>               |                    |
| <b>Subsystem</b>                                         | <b>Correlation</b> |
| 'KP' "Tyrosine metabolism"                               | 0.37807811         |
| 'EC' "Murein Biosynthesis"                               | 0.35593737         |
| 'ECs' "Murein Recycling"                                 | 0.35549066         |
| 'ECs' "Murein Biosynthesis"                              | 0.35531688         |
| 'ECs' "Threonine and Lysine Metabolism"                  | 0.26658649         |
| 'ECs' "Glycine and Serine Metabolism"                    | 0.26654447         |
| 'ECe' "Tyrosine Tryptophan and Phenylalanine Metabolism" | 0.25188833         |
| 'STy' "Threonine and Lysine Metabolism"                  | 0.24643722         |
| 'STy' "4 hydroxyphenylacetate catabolism"                | 0.23957028         |
| 'FP' "Unassigned"                                        | 0.22898343         |
| <b>Top 10 Negatively Correlated Fluxes</b>               |                    |
| <b>Subsystem</b>                                         | <b>Correlation</b> |
| 'BT' "Unassigned"                                        | -0.2324472         |
| 'ECs' "Oxidative Phosphorylation"                        | -0.2197121         |
| 'LL' "Valine Leucine and Isoleucine Metabolism"          | -0.217536          |
| 'HS' "Fatty Acid Synthesis"                              | -0.2046681         |
| 'FP' "Arginine and Proline Metabolism"                   | -0.1842717         |
| 'LP' "Alternate Carbon Metabolism"                       | -0.1819074         |
| 'STy' "Transport"                                        | -0.1813692         |
| 'ECs' "Pyruvate Metabolism"                              | -0.1669255         |
| 'KP' "Butanoate Metabolism"                              | -0.1645353         |
| 'KP' "Oxidative Phosphorylation"                         | -0.1603565         |
| <b>Feedback Two</b>                                      |                    |
| <b>Top 10 Positively Correlated Fluxes</b>               |                    |
| <b>Subsystem</b>                                         | <b>Correlation</b> |
| 'STy' "Folate Metabolism"                                | 0.59036697         |
| 'STy' "Purine and Pyrimidine Biosynthesis"               | 0.56859907         |
| 'STy' "Glycine and Serine Metabolism"                    | 0.30534423         |
| 'EC' "Murein Biosynthesis"                               | 0.28610424         |
| 'HS' "Heme degradation"                                  | 0.26066047         |
| 'BT' "Folate Metabolism"                                 | 0.2356027          |
| 'ECs' "Murein Recycling"                                 | 0.22444353         |

|                                                         |                    |
|---------------------------------------------------------|--------------------|
| 'STy' "Glyoxylate Metabolism"                           | 0.2131902          |
| 'HP' "ROS Detoxification"                               | 0.20816944         |
| 'HS' "Arginine and Proline Metabolism"                  | 0.2055416          |
| <b>Top 10 Negatively Correlated Fluxes</b>              |                    |
| <b>Subsystem</b>                                        | <b>Correlation</b> |
| 'HP' "dUTP Biosynthesis"                                | -0.2219613         |
| 'ECe' "Membrane Lipid Metabolism"                       | -0.2138996         |
| 'ECs' "Histidine Metabolism"                            | -0.20623           |
| 'ECs' "Citric Acid Cycle"                               | -0.1960893         |
| 'STy' "Exchange"                                        | -0.1955515         |
| 'HP' "dTTP Biosynthesis"                                | -0.1829439         |
| 'EC' "Citric Acid Cycle"                                | -0.1774323         |
| 'ECe' "Inorganic Ion Transport and Metabolism"          | -0.1770236         |
| 'ECs' "Alternate Carbon Metabolism"                     | -0.1741285         |
| 'HP' "Glycerolipid Synthesis"                           | -0.1558785         |
| <b>Feedback Three</b>                                   |                    |
| <b>Top 10 Positively Correlated Fluxes</b>              |                    |
| <b>Subsystem</b>                                        | <b>Correlation</b> |
| 'LL' "Pentose Phosphate Cycle"                          | 0.3745564          |
| 'LL' "Tyrosine Tryptophan and Phenylalanine Metabolism" | 0.36899784         |
| 'EC' "Cysteine Metabolism"                              | 0.32391016         |
| 'HS' "CoA catabolism"                                   | 0.32132078         |
| 'STy' "Methionine Metabolism"                           | 0.30245529         |
| 'KP' "Riboflavin Metabolism"                            | 0.28484411         |
| 'LL' "Lipid Cell Wall Metabolism"                       | 0.20341677         |
| 'ECs' "Unassigned"                                      | 0.19387464         |
| 'ECs' "Glutamate Metabolism"                            | 0.18582804         |
| 'LL' "Alternate Carbon Metabolism"                      | 0.18162498         |
| <b>Top 10 Negatively Correlated Fluxes</b>              |                    |
| <b>Subsystem</b>                                        | <b>Correlation</b> |
| 'HS' "Cholesterol metabolism"                           | -0.32022295        |
| 'HS' "Aminosugar Metabolism"                            | -0.28879565        |
| 'BT' "Glycine, Serine and Threonine Metabolism"         | -0.20810029        |
| 'BT' "Central Metabolism"                               | -0.19594971        |
| 'HS' "Transport, intercellular"                         | -0.19568761        |

| 'ECs' "Glycine and Serine Metabolism"                    | -0.18777028 |
|----------------------------------------------------------|-------------|
| 'ECs' "Threonine and Lysine Metabolism"                  | -0.18035997 |
| 'HS' "C5-branched dibasic acid metabolism"               | -0.17974225 |
| 'ECs' "Pyruvate Metabolism"                              | -0.17746382 |
| 'LL' "Methionine Metabolism"                             | -0.17189016 |
| <b>Feedback Four</b>                                     |             |
| <b>Top 10 Positively Correlated Fluxes</b>               |             |
| Subsystem                                                | Correlation |
| 'EC' "Nitrogen Metabolism"                               | 0.418806615 |
| 'ECs' "Glycerophospholipid Metabolism"                   | 0.387722707 |
| 'ECe' "Glycerophospholipid Metabolism"                   | 0.305090808 |
| 'KP' "Benzoate Degradation"                              | 0.248625539 |
| 'KP' "Nitrogen Metabolism"                               | 0.248442119 |
| 'KP' "Phenylalanine Metabolism"                          | 0.246854193 |
| 'STy' "Anaplerotic Reactions"                            | 0.226538326 |
| 'LL' "Cofactor and Prosthetic Group Biosynthesis"        | 0.216393231 |
| 'HS' "ROS Detoxification"                                | 0.20917127  |
| 'ECe' "Threonine and Lysine Metabolism"                  | 0.20755859  |
| <b>Top 10 Negatively Correlated Fluxes</b>               |             |
| Subsystem                                                | Correlation |
| 'LL' "Arginine and Proline Metabolism"                   | -0.29882075 |
| 'KP' "Cell Envelope Biosynthesis"                        | -0.2401224  |
| 'ECs' "Tyrosine Tryptophan and Phenylalanine Metabolism" | -0.22149735 |
| 'KP' "Transport, Extracellular"                          | -0.21482511 |
| 'HS' "Transport, peroxisomal"                            | -0.20553729 |
| 'KP' "Transport Outer Membrane"                          | -0.19956758 |
| 'LL' "Valine Leucine and Isoleucine Metabolism"          | -0.19853544 |
| 'EC' "Glycolysis/Gluconeogenesis"                        | -0.19484854 |
| 'EC' "Alternate Carbon Metabolism"                       | -0.19214115 |
| 'LL' "Central Metabolism"                                | -0.18940579 |
